# Supplementary material for: The Intersection of HPV Epidemiology, Genomics and Mechanistic Studies of HPV-Mediated Carcinogenesis
Source: Viruses. 2018 Feb 13;10(2):80. doi: 10.3390/v10020080 (PMC5850387; doi:10.3390/v10020080)
Supplement: Supplementary file 1 [file viruses-10-00080-s001.xlsx]

## Sheet: Sheet1
Supplementary Table 1. Full list of workshop attendees.
Name	Institute
Laia Alemany	Catalan Institute of Oncology, Spain
Lawrence Banks	International Centre for Genetic Engineering and Biotechnology, Italy
Sara Bass	DCEG-CGR, NCI, NIH
Joseph Boland	DCEG-CGR, NCI, NIH
Chris Buck	CCR, NCI, NIH
Laurie Burdett	DCEG-CGR, NCI, NIH
Robert Burk	Albert Einstein College of Medicine, NY
Anil Chaturvedi	DCEG, NCI, NIH
Megan Clarke	DCEG, NCI, NIH
Gary Clifford	International Agency for Research on Cancer (IARC), France
Michael Cullen	DCEG-CGR, NCI, NIH
Michael Dean	DCEG, NCI, NIH
Daniel DiMaio	Yale School of Public Health, CT
John Doorbar	University of Cambridge, Cambridge
Allan Hildesheim	DCEG, NCI, NIH
Lou Laimins	Northwestern University Feinberg School of Medicine, IL
Paul Lambert	University of Wisconsin-Madison, Wisconsin
Hong Lou	DCEG, NCI, NIH
Alison McBride	NIAID, NIH
Lisa Mirabello	DCEG, NCI, NIH
Karl Munger	Tufts University, MA
Chase Nelson	Sackler Institute for Comparative Genomics, American Museum of Natural History, NY
Miguel Angel Pavón Ribas	Catalan Institute of Oncology, Spain
Ligia Pinto	NCI-Frederick/SAIC-Frederick, Frederick, MD
Mark Schiffman	DCEG, NCI, NIH
John Schiller	CCR, NCI, NIH
Richard Schlegel	Georgetown University, Washington, DC
Stefan Schwartz	Lund University, Sweden
Mia Steinberg	DCEG-CGR, NCI, NIH
Sarah Wagner	DCEG-CGR, NCI, NIH
Nicolas Wentzensen	DCEG, NCI, NIH
Yanzi Xiao	DCEG, NCI, NIH
Qi Yang	DCEG-CGR, NCI, NIH
Meredith Yeager	DCEG-CGR, NCI, NIH
Kai Yu	DCEG, NCI, NIH
Bin Zhu	DCEG, NCI, NIH
DCEG, Division of Cancer Epidemiology and Genetics; NCI, National Cancer Institute; NIH, National Institutes of Health; CGR, Cancer Genomics Research laboratory; CCR, Center for Cancer Research.
